## Subcellular remodeling and heart dysfunction in chronic diabetes

Naranjan S. Dhalla<sup>a,\*</sup>, Xueliang Liu<sup>a</sup>, Vincenzo Panagia<sup>a</sup>, Nobuakira Takeda<sup>b</sup>

<sup>a</sup>*Institute of Cardiovascular Sciences, St. Boniface General Hospital Research Centre, 351 Tache Avenue, Department of Physiology, Faculty of Medicine, University of Manitoba, Winnipeg R2H 2A6, Canada*

<sup>b</sup>*Aoto Hospital, Jikei University, Tokyo, Japan*

Received 19 December 1997; accepted 8 June 1998

### Abstract

Heart dysfunction in chronic diabetes has been observed to be associated with depressed myofibrillar adenosine triphosphatase activities as well as abnormalities in the sarcoplasmic reticular and sarcolemmal calcium transport processes. The evidence has been presented to show that alterations in the expression of myosin isozymes and regulatory proteins as well as myosin phosphorylation contribute to the development of myofibrillar remodeling in the diabetic heart. Defects in sarcoplasmic reticular and sarcolemmal calcium transport appear to be due to the accumulation of lipid metabolites in the membrane. Different agents, such as calcium-antagonists, beta-adrenoceptor blockers, angiotensin converting enzyme inhibitors, metabolic interventions and antioxidants, have been reported to exert beneficial effects in preventing subcellular remodeling and cardiac dysfunction in chronic diabetes. Clinical and experimental investigations have suggested that increased sympathetic activity, activated cardiac renin–angiotensin system, myocardial ischemia/functional hypoxia and elevated levels of glucose for a prolonged period, due to insulin deficiency, result in oxidative stress. It is proposed that oxidative stress associated with a deficit in the status of the antioxidant defense system may play a critical role in subcellular remodeling, calcium-handling abnormalities and subsequent diabetic cardiomyopathy. © 1998 Elsevier Science B.V. All rights reserved.

**Keywords:** Diabetic cardiomyopathy; Myofibrils; Troponin–tropomyosin; Sarcoplasmic reticulum; Sarcolemma; Antioxidants

### 1. Introduction

In view of the fact that atherosclerosis is commonly seen in diabetic patients, relatively little attention has been paid to studying the problems associated with cardiac muscle during the development of diabetes [1,2]. The possibility of diabetic cardiomyopathy was suggested when diabetic patients at preclinical stages were found to exhibit a shortened left ventricular ejection time, a longer pre-ejection period and an elevated end-diastolic pressure [3]. Such defects in heart function in diabetic patients in the absence of coronary artery disease were considered to be due to increased ventricular wall stiffness, reduced cardiac contractility and a longer isovolumic relaxation [4]. On the other hand, diabetic patients with congestive heart failure showed myocardial hypertrophy and the presence of extensive myocytolytic changes, with replacement fibrosis as well as interstitial and perivascular fibrosis in the heart

[5,6]. While chronic diabetes induced by streptozotocin in rats has been shown to be associated with heart dysfunction, including reduced heart rate, depressed peak ventricular pressure as well as depressed rates of contraction and relaxation in the left ventricle [7–12], the combination of diabetes with hypertension in rats has been demonstrated to result in congestive heart failure [5,13]. It is also well known that diabetes is a risk factor for ischemic heart disease; however, it is not clear whether this is due to diabetes-induced microangiopathy [1] or to some other pathogenetic defect associated with insulin-deficiency. Recently, several reviews and articles [14–23] have been devoted to highlighting the underlying basis of diabetes-induced changes in cardiovascular function and metabolism. In this article, we would like to present evidence that heart dysfunction in chronic diabetes is mainly due to subcellular abnormalities in the myocardium. Although an attempt has been made to discuss the mechanisms of this complex problem and to identify the possible cause of

\*Corresponding author. Tel.: +204-235-3417; Fax: +204-233-6732; E-mail: cvso@sbr.umanitoba.ca

Time for primary review 31 days.

diabetic cardiomyopathy, it is emphasized that some of the statements in this review represent views of the authors for the purpose of stimulating research in this field.

## 2. Subcellular remodeling

Animal studies have revealed that heart dysfunction in chronic diabetes is associated with decreased activities of the  $\text{Ca}^{2+}$  ATPase of cardiac myofibrils, actomyosin and myosin [8,10,12,24,25]. Since the ability of diabetic heart to generate contractile force is dependent upon the magnitude of myofibrillar ATPase activation by  $\text{Ca}^{2+}$ , the depressed ATPase activities of contractile proteins can be seen to play an important role in the development of heart dysfunction due to diabetes. It has been identified that the depressed ATPase activity of myofibrils is due to alterations in myosin isozyme composition and regulatory proteins as well as to the phosphorylation of regulatory proteins in the diabetic heart [24–27]. It should be pointed out that diabetes is associated with a shift in myosin isozyme content from  $\text{V}_1$  to  $\text{V}_3$  in the heart [28–30]. The analysis of  $\alpha$ - and  $\beta$ -myosin heavy chain (MHC) mRNA and protein expression indicated the predominance of  $\alpha$ -MHC and  $\beta$ -MHC in control and diabetic hearts, respectively. Different  $\text{Ca}^{2+}$ -antagonists, metabolic interventions and exercise were found to improve the contractile function of the diabetic heart, increase myosin  $\text{Ca}^{2+}$ -ATPase activity and prevent the shift in myosin isozymes [1,7,28,31]. It should be mentioned that the human heart primarily expresses  $\text{V}_3$  or the  $\beta$ -isoform of myosin [32,33] and, thus, the shift of myosin isozymes observed in diabetic animal hearts may not be of physiological significance in the adaptation of human heart in diabetes. On the other hand, since the phosphorylation of myosin light chain (MLC) by myosin light chain kinase (MLCK) has been shown to play a modulatory role in the generation of contractile force in vertebrate striated muscle, MLC phosphorylation in cardiac muscle fibers showed a leftward shift in the force– $p\text{Ca}$  relationship and decreased cooperativity [34]. Recently, Liu et al. [26] have reported that the protein contents of MLC and MLCK as well as MLC phosphorylation were decreased significantly in the diabetic rat heart homogenate; these changes were partially reversible upon treatment with insulin.

The troponin–tropomyosin (TnTm) complex is made up of three troponin (Tn) subunits (TnC, the  $\text{Ca}^{2+}$  binding unit; TnI, the ATPase inhibitory unit and TnT, the tropomyosin binding unit) and tropomyosin. Earlier investigations have suggested that phosphorylation of TnI and TnT by protein kinase C (PKC) results in a decrease in the actomyosin ATPase activity and a decrease in the actin–myosin interaction. Phosphorylation of TnI and TnT by protein kinase A (PKA) has been associated with a reduced sensitivity of the myofibrillar  $\text{Mg}^{2+}$ -ATPase to  $\text{Ca}^{2+}$ . Thus, changes in the regulatory effects of the TnTm

complex on actin and myosin can be seen to explain the depressed myofibrillar ATPase activities in the diabetic heart. In fact, the decreased actomyosin ATPase activity in the hearts of diabetic animals was partially reversed when myosin from diabetic rats interacted with the TnTm protein complex isolated from control hearts [35]. Although no significant changes in protein content and gene expression of TnI were observed in the right and left ventricles from the diabetic rats, the phosphorylation of TnI was higher in the diabetic hearts [27]. Other studies have suggested that the increased phosphorylation of TnI in the diabetic hearts is a result of changes in the subcellular distribution of PKC isozymes [36]. Some studies focused on the relationship between the cardiac TnT isoforms and the force– $p\text{Ca}$  characteristics of the diabetic heart and have observed a significant shift from TnT<sub>1</sub> to TnT<sub>2</sub> and TnT<sub>3</sub> [37]. These findings have raised the possibility that changes in the  $\text{Ca}^{2+}$ -sensitivity of myofibrils in the diabetic myocardium are coupled with TnT alterations. Thus, it is evident that both contractile and regulatory proteins are remodeled in diabetic cardiomyopathy and that these changes are reflected by decreased myofibrillar ATPase activity and heart dysfunction.

A large body of evidence has accumulated to suggest the occurrence of remodeling of both sarcoplasmic reticulum and sarcolemmal membranes in the heart during the development of chronic diabetes [1,38,39]. Previous studies have shown a depression in the sarcoplasmic reticular  $\text{Ca}^{2+}$ -pump activity [9,40], which is considered to account for the inability of the diabetic heart to relax fully. However, the molecular mechanism for the sarcoplasmic reticular  $\text{Ca}^{2+}$ -pump depression are not clear because conflicting results concerning changes in mRNA level (gene expression) for the  $\text{Ca}^{2+}$ -pump protein have been reported in the diabetic heart [41–44]. The occurrence of  $\text{Ca}^{2+}$ -handling abnormalities in the cardiac cell has also been attributed to defects in the sarcolemmal  $\text{Na}^+$ – $\text{Ca}^{2+}$  exchange and  $\text{Ca}^{2+}$ -pump activities in diabetic hearts [45,46]. Sarcolemmal  $\text{Na}^+$ – $\text{K}^+$  ATPase and  $\text{Ca}^{2+}$ -binding activities were decreased [47,48], whereas sarcolemmal  $\text{Ca}^{2+}$ /Mg<sup>2+</sup> ecto-ATPase activities were increased [49,50] in diabetic cardiomyopathy. On the basis of differences in the control and diabetic hearts with respect to their electrophysiological and mechanical behavior in the presence of different concentrations of  $\text{Ca}^{2+}$ , abnormalities for  $\text{Ca}^{2+}$ -handling in diabetic hearts were also indicated [51]. Although the basal levels of intracellular free  $\text{Ca}^{2+}$ , as well as KCl- and ATP-induced increases in the intracellular concentration of free  $\text{Ca}^{2+}$ , in diabetic cardiomyocytes were not different from control preparations [52], the results regarding this aspect are controversial [19,20]. Such differences in results from various studies may be due to differences in the techniques employed for the measurement of the intracellular concentration of free  $\text{Ca}^{2+}$  and/or the intensity as well as the duration of diabetes. Nonetheless, abnormalities in  $\text{Ca}^{2+}$ -handling by diabetic myocar-

dium were evident from observations showing attenuated responses of diabetic cardiomyocytes to catecholamines, 8-bromo-cAMP and phosphatidic acid with respect to increasing the intracellular concentration of free  $\text{Ca}^{2+}$  [19,52]. In addition, the significance of defects in sarcoplasmic reticular and sarcolemmal membranes are evident from the depressed responsiveness of diabetic heart to rapid cooling, caffeine and other interventions that are known to affect these sites [19,20].

It should be pointed out that the changes observed in the cell membrane of the diabetic heart would favor the occurrence of intracellular  $\text{Ca}^{2+}$  overload in cardiomyocytes. It is emphasized that the intracellular  $\text{Ca}^{2+}$  overload referred to here should not be confused with the intracellular concentration of free  $\text{Ca}^{2+}$ , which may not change because free  $\text{Ca}^{2+}$  in the cytoplasm may become accumulated in the intracellular organelles of cardiomyocytes. In fact, elevated levels of myocardial  $\text{Na}^+$  and  $\text{Ca}^{2+}$  content have been reported in diabetes [53,54] and intracellular  $\text{Ca}^{2+}$ -overload has been shown to result in functional abnormalities in the heart [55,56]. Furthermore, verapamil, a well known  $\text{Ca}^{2+}$ -antagonist, was found to produce beneficial effects in diabetic cardiomyopathy because it attenuated changes in heart function, ultrastructure, subcellular activities and  $\text{Ca}^{2+}$  content in diabetic animals [28,54]. Verapamil has also been shown to prevent the increase in cardiac PKC activity in diabetic rats [57]. Although depressions in mitochondrial  $\text{Ca}^{2+}$ -uptake, stage 3 respiration, respiratory control index and  $\text{Mg}^{2+}$ -ATPase activities were also observed in diabetic heart [58], these alterations in the mitochondrial membrane were seen subsequent to changes in both the sarcolemma and sarcoplasmic reticulum. Such observations, however, do not rule out changes in mitochondrial function due to the occurrence of intracellular  $\text{Ca}^{2+}$  overload in diabetic cardiomyocytes. Thus, from the foregoing discussion, it is evident that remodeling of both sarcolemmal and sarcoplasmic reticular membranes may result in  $\text{Ca}^{2+}$ -handling abnormalities in cardiomyocytes and subsequent heart dysfunction during the development of diabetic cardiomyopathy.

### 3. Mechanisms of subcellular abnormalities

#### 3.1. Insulin deficiency

Several studies have indicated that the basal as well as insulin-stimulated glucose uptake in the diabetic heart is reduced due to either insulin deficiency or insulin resistance [59–61]. The reduced levels of mRNA and protein of the glucose transporter, GLUT4, have been observed in diabetic hearts from experimental animals and patients [62–65]. It is also clear that severe insulin deficiency results in large decreases in the activation of cardiac glycogen synthase and phosphatase activity [66]; a 20–

25% decrease in the protein phosphatase 1 catalytic subunit has been reported [67]. The hypersensitivity of phosphorylase activation in hearts from diabetic rats is well documented [66,68,69]; this abnormality was corrected by perfusion of diabetic hearts with low concentrations of calcium or reversed by adrenalectomizing the diabetic rats [69]. Since the regulation of calcium transport in the sarcoplasmic reticulum involves protein phosphatases [70], the diabetes-related hypersensitivity for the activation of phosphorylase can be explained by an increase in intracellular calcium or by a decrease in phosphorylase phosphatase. The role of changes in myocardial metabolism in the diabetic heart is further evident from the fact that different metabolic interventions, such as carnitine and etomoxir, which are known to depress the oxidation of free fatty acids and promote glucose utilization, were found to improve cardiac function in chronic diabetes [31,71]. Thus, a shift in myocardial metabolism resulting in an excessive use of free fatty acids and a marked reduction in the utilization of plasma glucose can be seen to play a critical role in the development of diabetic cardiomyopathy. In fact, accumulation of long chain fatty acids in the sarcoplasmic reticulum has been shown to alter the function of this membrane system in the diabetic heart [72] and a similar mechanism can also be seen to explain the defects in the sarcolemmal membrane in chronic diabetes. Alterations in the sarcoplasmic reticular and sarcolemmal membranes in diabetic heart have also been shown to be due to changes in the membrane phosphatidylethanolamine N-methylation [73,74]. Thus, it appears that insulin deficiency promotes alterations in the lipid composition of cardiac membranes and these may then be associated with remodeling of both sarcoplasmic reticulum and sarcolemma during the development of diabetic cardiomyopathy.

#### 3.2. Sympathetic nervous system

The involvement of increased sympathetic activity in diabetes is evident from observations showing the beneficial effects of  $\beta$ -adrenoceptor blockers in improving organ dysfunction [1]. Although an excessive amount of catecholamines are circulating in the body due to activation of the sympathetic nervous system at early stages of diabetes [75,76], there is an ample body of evidence showing depressed responses of diabetic heart to these hormones [77,78]. The attenuated responses of the diabetic myocardium to catecholamine have been shown to be due to a decreased number of  $\beta$ -adrenergic receptors and depressed epinephrine-stimulated adenylyl cyclase activities in diabetic cardiomyopathy [78,79]. The reduced number of adrenergic receptors and uncoupling of the adenylyl cyclase system in the myocardium of diabetic animals have also been observed by other investigators [80–82]. Such alterations in the diabetic heart have been attributed to a defect in the cell membrane as a consequence of increased

oxidation of catecholamines, which produces toxic substances such as oxyradicals and adrenochrome [1].

### 3.3. Renin–angiotensin system

The role of the renin–angiotensin system in the development of diabetic cardiomyopathy is apparent from the fact that different angiotensin converting enzyme (ACE) inhibitors and angiotensin II receptor blockers were observed to prevent diabetes-induced heart dysfunction, myocardial perfusion defects, alterations in sympathetic nerves, myocardial as well as interstitial fibrosis and a decline in the levels of glucose transporter in the myocardium [83–87]. Since the plasma renin–angiotensin system was either down-regulated or unaltered in diabetes [88–90], activation of the cardiac renin–angiotensin system in diabetes is more likely. This view is based on observations that the density and mRNA levels of angiotensin II receptors in the diabetes heart are increased [91–93]. Whether this cardiac renin–angiotensin system is involved directly or indirectly in inducing remodeling of the heart during diabetes is not clear at present, however, activation of the cardiac renin–angiotensin system can be seen to result in oxidative stress and this may lead to the development of diabetic cardiomyopathy. This concept is supported by observations that ACE inhibitors were found to increase both the enzymatic and nonenzymatic antioxidant defense mechanisms in the heart and other tissues [94]. Furthermore, ACE inhibitors were found to reduce the ischemia–reperfusion-induced formation of oxidized glutathione, accumulation of  $\text{Ca}^{2+}$  in mitochondria and the release of norepinephrine from the heart [95]. Thus, activation of the renin–angiotensin system can be considered to promote the formation of oxyradicals due to changes in mitochondrial function and the release of norepinephrine in addition to augmenting the activity of oxyradicals as a consequence of depletion of the tissue's antioxidants.

### 3.4. Thyroid deficiency

Diabetes mellitus is associated with a low thyroid state, as characterized by low serum thyroid hormone values in patients and animals [96–98]. The treatment of diabetic rats with pharmacological doses of T3 (triiodothyronine) or T4 (thyroxine) effectively reversed the decrease in myosin ATPase activity, without affecting the depression in cardiac function [29,31,99]. The enhanced positive inotropic response to  $\alpha$ -adrenergic stimulation in isolated atria of diabetic rats was also prevented by T3 treatment [100]. In addition, it has been reported that the regulation of cardiac  $\beta$ -MHC expression by insulin is a complex mechanism involving the interaction of insulin with subcellular factors that have an impact on the specific action of T3; this interaction may be disrupted in the absence of sufficient thyroid hormone [101]. Since alterations in sarcoplasmic reticular  $\text{Ca}^{2+}$ -transport as well as in cardiac function,

unlike the observed changes in contractile proteins, were not modified by the treatment of diabetic animals with thyroid hormones [9,99], it appears that diabetes-induced remodeling of cardiac membranes, unlike myofibrillar proteins, may not involve thyroid hormone deficiency in chronic diabetes.

### 3.5. Myocardial ischemia

A rapid rate of ventricular failure during ischemia has been observed in diabetic rat hearts [102]. Abnormalities of the coronary microcirculation, distinct from large-vessel atherosclerosis, have been reported in clinical and experimental diabetes mellitus. In this regard, morphological studies have indicated defects in the resistance vessels in diabetic patients and animals as well as functional abnormalities of the coronary circulation of diabetic animals [103,104]. Coronary vasodilation in response to norepinephrine, calcium and paced tachycardia was impaired in the isolated diabetic rat hearts [105]. The resting coronary blood flow in diabetic lambs was reduced over a wide range of aortic pressures in comparison with the control animals [106]. The peak reactive hyperemic response after a brief coronary occlusion as well as due to adenosine was attenuated in anesthetized diabetic dogs [107]. Basal production of thromboxane by coronary artery rings was increased whereas production of prostacyclin by coronary rings during hypoxia and  $\alpha$ -adrenergic stimulation was impaired in diabetic rats [108]. Nitenberg et al. [109] reported a reduced maximal coronary blood flow reserve and impaired endothelial-dependent epicardial coronary vasodilation in diabetic patients. Nahser et al. [110] observed a reduction in the maximal coronary vasodilation as well as impaired regulation of coronary flow in response to submaximal increases in myocardial demand in patients with diabetes mellitus. These microvascular abnormalities suggest the occurrence of myocardial ischemia in the absence of coronary atherosclerosis in diabetic patients and animals. Thus, microangiopathy can be seen to result in myocardial ischemia and/or functional hypoxia, which may be one of the crucial factors for the occurrence of oxidative stress and remodeling of the subcellular organelles in the diabetic heart.

### 3.6. Oxidative stress

Clinical and experimental evidence has suggested that free-radical-mediated oxidative processes are involved in the pathogenesis of diabetic complications [111–115]. An increase in the production of free radicals can result from the hyperglycemia-induced enhancement in glucose autooxidation, protein glycation and subsequent oxidative degradation of glycated proteins [116–118]. Since cellular defense mechanisms, such as antioxidants and antioxidant enzymes (superoxide dismutase, catalase and glutathione peroxidase), play a fundamental role in protecting the cell

against reactive free radical and other oxidant species [119], it is possible that a loss of these factors will promote the occurrence of oxidative stress during the development of diabetic cardiomyopathy. However, increases in superoxide dismutase, glutathione peroxidase and catalase activities have been observed in diabetic rat heart [120–122]. Although increased levels of tissue antioxidant may serve as an adaptive mechanism during the early stages of diabetes, this antioxidant reserve may get depleted with time and the balance may be tilted towards oxidative stress and subsequent heart dysfunction. This view is consistent with some studies indicating that oxidative stress may play a role in the development of perivascular fibrosis and severe changes of the autonomic nerves and endothelial system in the myocardium [123]. Not only the status of the tissue antioxidant level determines the degree of oxidative stress and organ function, the impairment of endothelium may also promote oxidative stress activity. Although a direct relationship between endothelial changes and the occurrence of diabetic cardiomyopathy has not been examined thus far, a defective endothelium has been shown to produce an imbalance, due to reduced production of nitric oxide and increased formation of oxyradicals, and is thus considered to promote the risk of coronary artery disease [114]. On the other hand, an excessive amount of nitric oxide produced due to endothelial dysfunction and superoxide radicals formed as a consequence of increased autoxidation of glucose and protein glycation [116–118,123] can also be seen to react with each other to result in the formation of a strong oxidant, peroxynitrite and, thus, promote the occurrence of oxidative stress in diabetes. Nonetheless, the role of oxidative stress in diabetes-associated complications in different organs, including

diabetic cardiomyopathy, is evident from observations that the treatment of diabetes with vitamin E and other antioxidants has been shown to increase the tissue's antioxidant levels, improve the action of insulin, promote endothelial function, prevent oxidation of serum lipids, suppress protein glycation and reduce the oxidative load [124–130]. A direct relationship between oxidative stress and the development of cardiomyopathy in chronic diabetes, however, remains to be established.

#### 4. Concluding remarks

Since diabetes is associated with increased levels of circulating catecholamines as well as myocardial ischemia/hypoxia, which are known to promote the formation of oxyradicals and oxidants, it is likely that oxidative stress may play a central role in the development of subcellular remodeling and subsequent heart dysfunction in chronic diabetes. An initial increase in the level of tissue antioxidants can be seen to maintain organ function and, thus, depletion of tissue antioxidants would favor the occurrence of oxidative stress. An insulin-deficiency-associated metabolic shift as well as an increase in plasma glucose levels would also result in the increased formation of oxyradicals, due to increased autoxidation of glucose and dramatic alterations in mitochondrial function. Activation of renin-angiotensin, which results in the depletion of tissue antioxidant, as well as the impaired function of endothelium, may also produce conditions favoring oxidative stress in diabetes. Accordingly, a scheme showing the involvement of oxidative stress in the development of diabetic cardiomyopathy is shown in Fig. 1. Support for

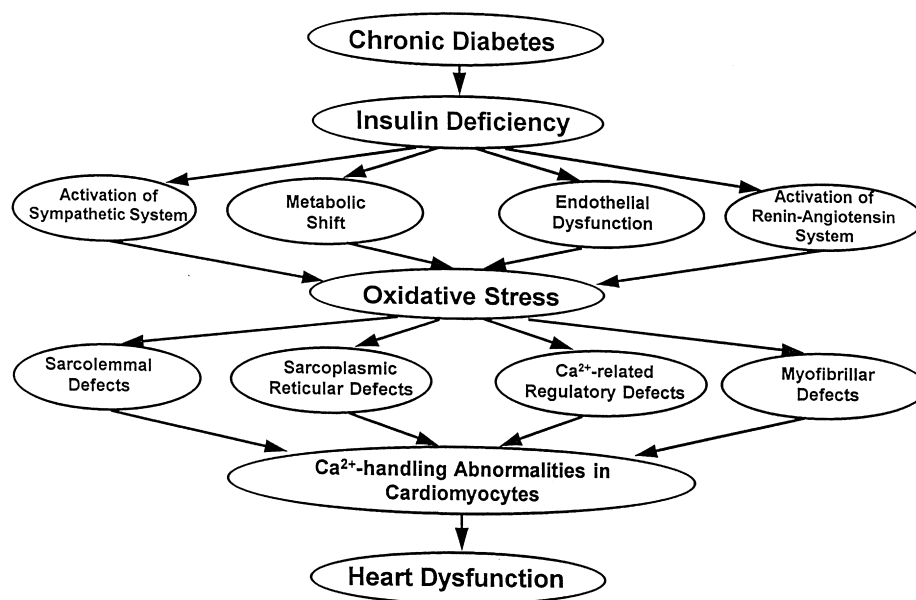

Fig. 1. Proposed mechanisms for the remodeling of subcellular organelles involving oxidative stress as a focal point for heart dysfunction during the development of diabetic cardiomyopathy.

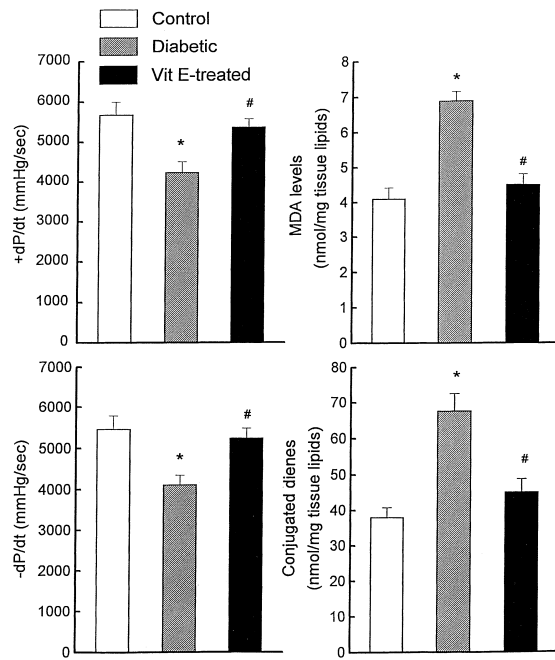

Fig. 2. Alterations in the left ventricular rate of contraction ( $+dP/dt$ ) and rate of relaxation ( $-dP/dt$ ) as well as malondialdehyde and conjugated dienes contents in diabetic rats with or without vitamin E treatment. Diabetes in rats was induced by an injection of streptozotocin (60 mg/kg, i.v.) and the animals were assessed hemodynamically eight weeks later by methods given elsewhere [9,54]. At the end of the hemodynamic assessment, the left ventricle was processed for biochemical analysis. Control rats received an injection of citrate buffer. Treatment of rats with vitamin E (25 mg/kg/day, i.p.) was started 24 h after inducing diabetes. Each value is a mean  $\pm$  SE of six experiments. \* $P < 0.05$  in comparison to control; # $P < 0.05$  in comparison to the untreated diabetic group.

this hypothesis is evident from our experiments in which the treatment of streptozotocin-induced diabetes in rats with vitamin E was observed to prevent the attenuated rate of contraction ( $+dP/dt$ ) and rate of relaxation ( $-dP/dt$ ) as well as augmented levels of malondialdehyde and conjugated dienes in the diabetic heart (Fig. 2). Furthermore, treatment of diabetic animals with vitamin E was found to

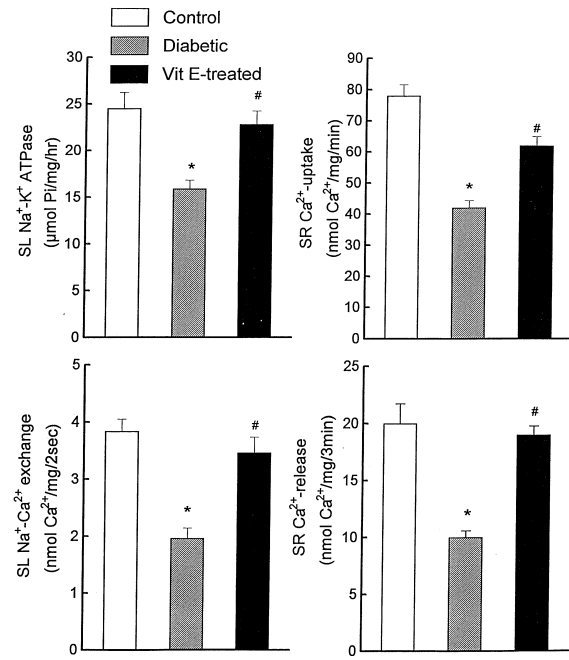

Fig. 3. Alterations in the left ventricle sarcolemmal (SL)  $\text{Na}^+ - \text{K}^+$  ATPase and  $\text{Na}^+ - \text{Ca}^{2+}$  exchange activities as well as sarcoplasmic reticular (SR)  $\text{Ca}^{2+}$ -uptake and  $\text{Ca}^{2+}$ -release activities in diabetic rats with or without vitamin E treatment. The methods for inducing diabetes and vitamin E treatment were the same as described in the legend for Fig. 2, whereas the procedures for the assessment of SL and SR functions are same as given elsewhere [12]. Each value is a mean  $\pm$  SE of six experiments. \* $P < 0.05$  in comparison to control; # $P < 0.05$  in comparison to the diabetic group.

prevent depressions in cardiac myofibrillar  $\text{Ca}^{2+}$ -ATPase activity (Table 1), sarcolemmal  $\text{Na}^+ - \text{K}^+$  ATPase and  $\text{Na}^+ - \text{Ca}^{2+}$  exchange activities as well as sarcoplasmic reticular  $\text{Ca}^{2+}$ -uptake and  $\text{Ca}^{2+}$ -release activities in chronic diabetes (Fig. 3). Since we did not measure the free radical species in diabetic animals with or without vitamin E treatment, the interpretation of the beneficial effects of vitamin E in terms of its antioxidant activity should be made with some caution. Although some caution

Table 1  
General characteristics and cardiac myofibrillar ATPase activities in diabetic rats with or without vitamin E treatment

|                                                                                               | Control        | Diabetic                   | Diabetic + vitamin E       |
|-----------------------------------------------------------------------------------------------|----------------|----------------------------|----------------------------|
| Body weight (g)                                                                               | 495 $\pm$ 16   | 301 $\pm$ 17 <sup>a</sup>  | 315 $\pm$ 21 <sup>a</sup>  |
| Ventricular weight (g)                                                                        | 1068 $\pm$ 124 | 826 $\pm$ 41 <sup>a</sup>  | 842 $\pm$ 33 <sup>a</sup>  |
| Plasma glucose (mg/dl)                                                                        | 151 $\pm$ 7.6  | 487 $\pm$ 9.2 <sup>a</sup> | 478 $\pm$ 8.8 <sup>a</sup> |
| Plasma insulin ( $\mu\text{U}/\text{ml}$ )                                                    | 28 $\pm$ 2.4   | 11 $\pm$ 0.7 <sup>a</sup>  | 12 $\pm$ 0.9 <sup>a</sup>  |
| Myofibrillar $\text{Ca}^{2+}$ -stimulated ATPase activity ( $\mu\text{mol P}_i/\text{mg/h}$ ) | 11.6 $\pm$ 0.9 | 5.8 $\pm$ 0.5 <sup>a</sup> | 8.4 $\pm$ 0.4 <sup>a</sup> |
| Myofibrillar $\text{Mg}^{2+}$ ATPase activity ( $\mu\text{mol P}_i/\text{mg/h}$ )             | 3.8 $\pm$ 0.2  | 3.7 $\pm$ 0.2              | 3.9 $\pm$ 0.3              |

The methods for inducing diabetes and the vitamin E treatment were the same as described in the legend for Fig. 2, whereas the procedures for the isolation and measurement of myofibrillar ATPase are the same as given elsewhere [25].

Each value is a mean  $\pm$  SE of six experiments.

<sup>a</sup> $P < 0.05$  in comparison to control.

should also be exercised while extrapolating the animal data to patients with diabetes, this study suggests a need for clinical trials with antioxidants in the diabetic population.

### Acknowledgements

The research work reported in this article was supported by a grant from the Medical Research Council of Canada (MRC Group in Experimental Cardiology).

### References

- [1] Dhalla NS, Pierce GN, Innes IR, Beamish RE. Pathogenesis of cardiac dysfunction in diabetes mellitus. *Can J Cardiol* 1985;1:26.
- [2] Fein FS, Sonnenblick EH. Diabetic cardiomyopathy. *Prog Cardiovasc Dis* 1985;25:255–270.
- [3] Ahmed SS, Jaferi G, Narang RM, Regan TJ. Preclinical abnormality of left ventricular function in diabetes mellitus. *Am Heart J* 1975;89:153–158.
- [4] Shapiro LM. Echocardiographic features of impaired ventricular function in diabetes mellitus. *Br Heart J* 1982;47:439–444.
- [5] Factor SM, Minase T, Sonnenblick EH. Clinical and morphological features of human hypertensive–diabetic cardiomyopathy. *Am Heart J* 1980;99:446–458.
- [6] Regan TJ. Congestive heart failure in the diabetic. *Annu Rev Med* 1983;34:161–168.
- [7] Fein FS, Malhotra A, Miller GB, Scheuer J, Sonnenblick EH. Diabetic cardiomyopathy in rats: mechanical and biochemical response to different insulin doses. *Am J Physiol* 1984;247:H817–H823.
- [8] Fein FS, Strobeck JE, Malhotra A, Scheuer J. Reversibility of diabetic cardiomyopathy with insulin in rats. *Circ Res* 1981;49:1251–1261.
- [9] Ganguly PK, Pierce GN, Dhalla KS, Dhalla NS. Defective sarcoplasmic reticular calcium transport in diabetic cardiomyopathy. *Am J Physiol* 1983;244:E528–E535.
- [10] Pierce GN, Dhalla NS. Cardiac myofibrillar ATPase activity in diabetic rats. *J Mol Cell Cardiol* 1981;13:1063–1069.
- [11] Vadlamudi RVS, Rodgers RL, McNeill JH. The effect of chronic alloxan- and streptozotocin-induced diabetes on isolated rat heart performance. *Can J Physiol Pharmacol* 1982;60:902–911.
- [12] Takeda N, Dixon IMC, Hata T, et al. Sequence of alterations in subcellular organelles during the development of heart dysfunction in diabetes. *Diabetes Res Clin Pract* 1996;30(Suppl):S113–S122.
- [13] Factor SM, Minase T, Bhan R, Wolinsky H, Sonnenblick EH. Hypertensive diabetic cardiomyopathy in the rat: Ultrastructural features. *Virchows Arch* 1983;398:305–317.
- [14] Stanley WC, Lopaschuk GD, McCormack JG. Regulation of energy substrate metabolism in the diabetic heart. *Cardiovasc Res* 1997;34:25–33.
- [15] Malhotra A, Sanghi V. Regulation of contractile proteins in diabetic heart. *Cardiovasc Res* 1997;34:34–40.
- [16] Pierce GN, Russell JC. Regulation of intracellular  $Ca^{2+}$  in the heart during diabetes. *Cardiovasc Res* 1997;34:41–47.
- [17] Feuvray D. The regulation of intracellular pH in the diabetic myocardium. *Cardiovasc Res* 1997;34:48–54.
- [18] Stehouwer CDA, Lambert J, Donker AJM, van Hinsberg VWM. Endothelial dysfunction and pathogenesis of diabetic angiopathy. *Cardiovasc Res* 1997;34:55–58.
- [19] Yu JZ, Rodrigues B, McNeill JH. Intracellular calcium levels are unchanged in the diabetic heart. *Cardiovasc Res* 1997;34:91–98.
- [20] Hayashi H, Noda N. Cytosolic  $Ca^{2+}$  concentration decreases in diabetic rat myocytes. *Cardiovasc Res* 1997;34:99–103.
- [21] Schaffer SW, Bellard-Croft C, Berth S, Allo SN. Mechanisms underlying depressed  $Na^+/Ca^{2+}$  exchanger activity in the diabetic heart. *Cardiovasc Res* 1997;34:129–136.
- [22] Pieper GM, Langenstroer P, Siebeneich W. Diabetic-induced endothelial dysfunction in rat aorta: Role of hydroxyl radicals. *Cardiovasc Res* 1997;34:145–156.
- [23] Koltai MZ, Hadhazy P, Posa I, et al. Characteristics of coronary endothelial dysfunction in experimental diabetes. *Cardiovasc Res* 1997;34:157–163.
- [24] Dillmann WH. Diabetes mellitus induces changes in cardiac myosin of the rat. *Diabetes* 1980;29:579–582.
- [25] Pierce GN, Dhalla NS. Mechanisms of the defect in cardiac myofibrillar function during diabetes. *Am J Physiol* 1985;248:E170–E175.
- [26] Liu X, Takeda N, Dhalla NS. Myosin light-chain phosphorylation in diabetic cardiomyopathy in rats. *Metabolism* 1997;46:71–75.
- [27] Liu X, Takeda N, Dhalla NS. Troponin I phosphorylation in heart homogenate from diabetic rat. *Biochim Biophys Acta* 1996;1316:78–84.
- [28] Afzal N, Pierce GN, Elimban V, Beamish RE, Dhalla NS. Influence of verapamil on some subcellular defects in diabetic cardiomyopathy. *Am J Physiol* 1989;256:E453–E458.
- [29] Dillmann WH. Influence of thyroid hormone administration on myosin ATPase activity and myosin isoenzyme distribution in the heart of diabetic rats. *Metabolism* 1982;31:199–204.
- [30] Rupp H, Elimban V, Dhalla NS. Diabetes-like action of intermittent fasting on sarcoplasmic reticulum  $Ca^{2+}$ -pump ATPase and myosin isoenzymes can be prevented by sucrose. *Biochem Biophys Res Commun* 1989;164:319–325.
- [31] Tahiliani AG, McNeill JH. Effects of triiodothyronine and carnitine therapy on myocardial dysfunction in diabetic rats. *Can J Physiol Pharmacol* 1986;64:669–672.
- [32] Mercadier JJ, Bouveret P, Gorza L, et al. Myosin isoenzymes in normal and hypertrophied human ventricular myocardium. *Circ Res* 1983;53:52–62.
- [33] Caforio ALP, Grazzini M, Mann JM, et al. Identification of  $\alpha$ - and  $\beta$ -cardiac myosin heavy chain isoforms as major autoantigens in dilated cardiomyopathy. *Circulation* 1992;85:1734–1742.
- [34] Sweeney HL, Stull JT. Phosphorylation of myosin in permeabilized mammalian cardiac and skeletal muscle cells. *Am J Physiol* 1986;250:C657–C660.
- [35] Malhotra A, Lopez MC, Nakouzi A. Troponin subunits contribute to altered myosin ATPase activity in diabetic cardiomyopathy. *Mol Cell Biochem* 1995;151:165–172.
- [36] Malhotra A, Reich D, Reich D, et al. Experimental diabetes is associated with functional activation of protein kinase C $\epsilon$  and phosphorylation of troponin I in the heart, which are prevented by angiotensin II receptor blockade. *Circ Res* 1997;81:1027–1033.
- [37] Akella AB, Ding X, Cheng R, Gulati J. Diminished  $Ca^{2+}$  sensitivity of skinned cardiac muscle contractility coincident with troponin T-band shifts in the diabetic rat. *Circ Res* 1995;76:600–606.
- [38] Shaffer SW. Cardiomyopathy associated with non-insulin-dependent diabetes. *Mol Cell Biochem* 1991;107:1–20.
- [39] Golfman LS, Takeda N, Dhalla NS. Cardiac membrane  $Ca^{2+}$ -transport in alloxan-induced diabetes in rats. *Diabetes Res Clin Pract* 1996;31(Suppl):S73–S77.
- [40] Lopaschuk GD, Tahiliani AG, Vadlamudi RVS, Katz S, McNeill JH. Cardiac sarcoplasmic reticulum function in insulin- or creatine-treated diabetic rats. *Am J Physiol* 1983;245:H969–H976.
- [41] Russ M, Reinauer H, Eckel J. Diabetes-induced decrease in the mRNA coding for sarcoplasmic reticulum  $Ca^{2+}$  ATPase in adult rat cardiomyocytes. *Biochem Biophys Res Commun* 1991;178:906–912.
- [42] Zarain-Herzberg A, Yano K, Elimban V, Dhalla NS. Cardiac sarcoplasmic reticulum  $Ca^{2+}$ -ATPase expression in streptozotocin-

- induced diabetes. *Biochem Biophys Res Commun* 1994;203:113–120.
- [43] Dillmann WH. Diabetes-induced changes in specific proteins and mRNAs in the rat heart. In: Nagano M, Dhalla NS, editors. *The diabetic heart*. New York: Raven Press, 1991:263–270.
- [44] Xu Y-J, Elimban V, Takeda S, et al. Cardiac sarcoplasmic reticulum function and gene expression in chronic diabetes. *Cardiovasc Pathobiol* 1996;1:89–96.
- [45] Heyliger CE, Prakash A, McNeill JH. Alterations in cardiac sarcolemmal  $\text{Ca}^{2+}$  pump activity during diabetes mellitus. *Am J Physiol* 1987;525:H540–H544.
- [46] Makino N, Dhalla KS, Elimban V, Dhalla NS. Sarcolemmal  $\text{Ca}^{2+}$  transport in streptozotocin-induced diabetic cardiomyopathy in rats. *Am J Physiol* 1987;253:E202–E207.
- [47] Pierce GN, Dhalla NS. Sarcolemmal  $\text{Na}^{+}$ - $\text{K}^{+}$  ATPase activity in diabetic rat heart. *Am J Physiol* 1983;245:C241–C247.
- [48] Pierce GN, Kutryk MJB, Dhalla NS. Alterations in calcium binding and composition of the cardiac sarcolemmal membrane in chronic diabetes. *Proc Natl Acad Sci USA* 1983;80:5412–5416.
- [49] Borda E, Pascuala J, Wald M, Sterin-Borda L. Hypersensitivity to calcium associated with an increased sarcolemmal  $\text{Ca}^{2+}$ -ATPase activity in diabetic rat heart. *Can J Cardiol* 1988;4:97–101.
- [50] Dhalla NS, Smith CI, Pierce GN, et al. Heart sarcolemmal cation pumps and binding sites. In: Rupp H, editor. *The regulation of heart function*. New York: Thieme, 1986:121–136.
- [51] Sauviat MP, Feuvray D. Electrophysiological analysis of the sensitivity to calcium in ventricular muscle from alloxan diabetic rats. *Basic Res Cardiol* 1986;81:489–496.
- [52] Xu Y-J, Botsford MW, Panagia V, Dhalla NS. Responses of heart function and intracellular free  $\text{Ca}^{2+}$  to phosphatidic acid in chronic diabetes. *Can J Cardiol* 1996;12:1092–1098.
- [53] Regan TJ, Wu CF, Yeh CK, Oldewurtel HA, Haider B. Myocardial composition and function in diabetes. *Circ Res* 1981;49:1268–1277.
- [54] Afzal N, Ganguly PK, Dhalla KS, et al. Beneficial effects of verapamil in diabetic cardiomyopathy. *Diabetes* 1988;37:936–942.
- [55] Dhalla NS, Das PK, Sharma GP. Subcellular basis of cardiac contractile failure. *J Mol Cell Cardiol* 1978;10:363–385.
- [56] Dhalla NS, Pierce GN, Panagia V, Singal PK, Beamish RE. Calcium movements in relation to heart function. *Basic Res Cardiol* 1982;77:117–139.
- [57] Tanaka Y, Kashiwagi A, Ogawa T, Abe N, Asahina T. Effect of verapamil on cardiac protein kinase C activity in diabetic rats. *Eur J Pharmacol* 1991;200:353–356.
- [58] Pierce GN, Dhalla NS. Heart mitochondrial function in chronic experimental diabetes in rats. *Can J Cardiol* 1985;1:48–54.
- [59] Kaestner KH, Flores-Riveros JR, McLenithan JC, Janicot M, Lane MD. Transcriptional repression of the mouse insulin-responsive glucose transporter (GLUT4) gene by cAMP. *Proc Natl Acad Sci USA* 1991;88:1933–1937.
- [60] Kainulainen H, Breiner M, Schurmann A, et al. In vivo glucose uptake and glucose transporter proteins GLUT1 and GLUT4 in heart and various types of skeletal muscle from streptozotocin-diabetic rats. *Biochim Biophys Acta* 1994;1225:275–282.
- [61] Stroedter D, Schmidt T, Bretzel RG, Federlin K. Glucose metabolism and left ventricular dysfunction are normalized by insulin and islet transplantation in mild diabetes in the rat. *Acta Diabetol* 1995;32:235–243.
- [62] Berger J, Biswa C, Vicario PP, et al. Decreased expression of the insulin-responsive glucose transporter in diabetes and fasting. *Nature* 1989;340:70–72.
- [63] Camps M, Castello A, Munoz P, et al. Effect of diabetes and fasting on GLUT-4 (muscle/fat) glucose-transporter expression in insulin-sensitive tissues. Heterogeneous response in heart, red and white muscle. *Biochem J* 1992;282:765–772.
- [64] Dahl J, Herman WH, Hicks RJ, et al. Myocardial glucose uptake in patients with insulin-dependent diabetes mellitus assessed quantitatively by dynamic positron emission tomography. *Circulation* 1993;88:395–404.
- [65] Sivitz WI, DeSautel SL, Kayano T, Bell GI, Pessin JE. Regulation of glucose transporter messenger RNA in insulin-deficient states. *Nature* 1989;340:72–74.
- [66] Miller Jr. TB. Altered regulation of cardiac glycogen metabolism in spontaneously diabetic rats. *Am J Physiol* 1983;245:E379–E383.
- [67] Rulfs J, Jaspers SR, Garnache AK, Miller Jr. TB. Phosphorylase synthesis in diabetic hepatocytes and cardiomyocytes. *Am J Physiol* 1989;257:E74–E80.
- [68] Miller Jr. TB, Praderio M, Wolleben C, Bullman J. A hypersensitivity of glycogen phosphorylase activation in hearts of diabetic rats. *J Biol Chem* 1981;256:1748–1753.
- [69] Miller Jr. TB. Phosphorylase activation hypersensitivity in hearts of diabetic rats. *Am J Physiol* 1984;246:E134–E140.
- [70] Kranias EG. Regulation of calcium transport by protein phosphatase activity associated with cardiac sarcoplasmic reticulum. *J Biol Chem* 1985;260:11006–11010.
- [71] Schmitz FJ, Rosen P, Reinauer H. Improvement of myocardial function and metabolism in diabetic rats by the carnitine palmitoyl transferase inhibitor etomoxir. *Horm Metab Res* 1995;27:515–522.
- [72] Lopaschuk GD, Tahiliani AG, Vadlamudi RVS, Katz S, McNeill JH. The effect of alloxan- and streptozotocin-induced diabetes on calcium transport in rat cardiac sarcoplasmic reticulum. The possible involvement of long chain acyl-carnitines. *Can J Physiol Pharmacol* 1984;61:439–448.
- [73] Ganguly PK, Rice KM, Panagia V, Dhalla NS. Sarcolemmal phosphatidylethanolamine N-methylation in diabetic cardiomyopathy. *Circ Res* 1984;55:504–512.
- [74] Panagia V, Taira Y, Ganguly PK, Dhalla NS. Alteration in phospholipid N-methylation of cardiac subcellular membranes due to experimentally-induced diabetes in rats. *J Clin Invest* 1990;86:777–784.
- [75] Ganguly PK, Dhalla KS, Innes IR, et al. Altered norepinephrine turnover and metabolism in diabetic cardiomyopathy. *Circ Res* 1986;59:684–693.
- [76] Ganguly PK, Beamish RE, Dhalla KS, Innes IR, Dhalla NS. Norepinephrine storage, distribution and release in diabetic cardiomyopathy. *Am J Physiol* 1987;252:E734–E739.
- [77] Gotzsche O. Decreased myocardial calcium uptake after isoproterenol in streptozotocin-induced diabetic rats. *Lab Invest* 1983;48:156–161.
- [78] Gotzsche O. The adrenergic  $\beta$ -receptor adenylate cyclase system in heart and lymphocytes from streptozotocin-diabetic rats. *Diabetes* 1983;32:1110–1116.
- [79] Smith CE, Pierce GN, Dhalla NS. Alterations in adenylate cyclase activity due to streptozotocin-induced diabetic cardiomyopathy. *Life Sci* 1984;34:1223–1230.
- [80] Ingebretsen CG, Hawelu-Johnson C, Ingebretsen WR. Alloxan-induced diabetes reduces  $\beta$ -adrenergic receptor number without affecting adenylate cyclase in rat ventricular membranes. *J Cardiovasc Pharmacol* 1983;5:454–461.
- [81] Wald M, Borda ES, Sterin-Borda L.  $\alpha$ -Adrenergic supersensitivity and decreased number of  $\alpha$ -adrenoceptors in heart from acute diabetic rats. *Can J Physiol Pharmacol* 1987;66:1154–1160.
- [82] Williams RS, Schaible TF, Scheuer J, Kennedy R. Effect of experimental diabetes or adrenergic and cholinergic receptor of rat myocardium. *Diabetes* 1983;32:881–886.
- [83] Rosen P, Pogatsa G, Tschöpe D, Addicks K, Reinauer H. Diabetische kardiopathie. Pathophysiologische konzepte und therapeutische ansätze. *Klin Wochensche* 1992;69(Suppl XXIX):3–15.
- [84] Rosen R, Rump AFE, Rosen P. The ACE-inhibitor captopril improves myocardial perfusion in spontaneously diabetic (BB) rats. *Diabetologia* 1995;38:509–517.
- [85] Rosen P, Rump AFE, Rosen R. Influence of angiotensin-converting enzyme inhibition by fosinopril on myocardial perfusion in streptozotocin-diabetic rats. *J Cardiovasc Pharmacol* 1996;27:64–70.
- [86] Hoeneck C, Rosen P. Inhibition of angiotensin type 1 receptor prevents decline of glucose transporter (GLUT 4) in diabetic rat heart. *Diabetes* 1996;45(Suppl 1):S82–S87.



- [87] Addicks K, Boy C, Rosen P. Sympathetic autonomic neuropathy in the heart of the spontaneous diabetic BB rat. *Annals of Anatomy/Anatomischer Anzeiger* 1993;175:253–257.
- [88] Cassis LA. Down regulation of the renin–angiotensin system in STZ-diabetic rats. *Am J Physiol* 1992;262:E105–E109.
- [89] Christlieb AR. Renin–angiotensin and NE in alloxan diabetes. *Diabetes* 1974;23:962–970.
- [90] Rett K, Janch KW, Wicklmayr M, et al. Angiotensin converting enzyme inhibitors in diabetes: experimental and human experience. *Postgrad Med J* 1996;62:59–64.
- [91] Christlieb AR, Underwood L. Renin–angiotensin–aldosterone system, electrolyte homeostasis and blood pressure in alloxan diabetes. *Am J Med Sci* 1979;277:295–303.
- [92] Sechi A, Griffin CA, Shambelan M. The cardiac renin–angiotensin system in STZ-induced diabetes. *Diabetes* 1994;43:1180–1184.
- [93] Khatler JC, Sadi P, Zhang M, Hoeschen RJ. Myocardial receptors in diabetic rat. *Ann NY Acad Sci* 1996;793:466–472.
- [94] de-Cavanagh EM, Fraga CG, Ferder L, Inserra F. Enalapril and captopril enhance antioxidant defenses in mouse tissues. *Am J Physiol* 1997;272:R514–R518.
- [95] Cargnoni A, Boraso A, Scotti C, et al. Effect of angiotensin converting enzyme inhibition with quinaprilat on the ischaemic and reperfusion myocardium. *J Mol Cell Cardiol* 1994;26:69–86.
- [96] Bjorn-Hansen-Gotzsche LS, Gotzsche O, Flyvbjerg A, Boye N. Early changes in thyroid hormone metabolism in the heart, liver, and brown adipose tissue during the induction of low T3 syndrome in streptozotocin-diabetic rats. *Acta Endocrinol* 1990;123:67–71.
- [97] Jolin T, Gonzalez C, Gonzalez M. Thyroid iodine metabolism in streptozotocin-diabetic rats. *Acta Endocrinol* 1978;88:506–516.
- [98] Wartofski L, Burman KD. Alterations in thyroid function in patients with systemic illness: the ‘euthyroid sick syndrome’. *Endocr Rev* 1982;3:164–217.
- [99] Garber DW, Everett AW, Neely JR. Cardiac function and myosin ATPase in diabetic rats treated with insulin, T<sub>3</sub> and T<sub>4</sub>. *Am J Physiol* 1983;244:H592–H598.
- [100] Goyal RK, Rodrigues B, McNeill JH. Effect of tri-iodothyronine on cardiac responses to adrenergic-agonists in STZ-induced diabetic rats. *Gen Pharmacol* 1987;18:357–362.
- [101] Haddad F, Masatsugu M, Bodel PW, et al. Role of thyroid hormone and insulin in control of cardiac isomyosin expression. *J Mol Cell Cardiol* 1997;29:559–569.
- [102] Feuvray D, Idell-Wenger JA, Neely JR. Effects of ischaemia on rat myocardial function and metabolism in diabetes. *Circ Res* 1979;44:322–329.
- [103] Yarom R, Zirkin H, Stammler G, Rose AG. Human coronary microvessels in diabetes and ischaemia: morphometric study of autopsy material. *J Pathol* 1992;166:265–270.
- [104] Tasca C, Stefanescu L, Vasilescu C. The myocardial microangiopathy in human and experimental diabetes mellitus: a microscopic, ultrastructural, morphometric and computer-assisted symbolic–logic analysis. *Endocrinologie* 1986;24:59–69.
- [105] Durante W, Sunahara FA, Sen AK. Effect of diabetes on metabolic coronary dilatation in the rat. *Cardiovasc Res* 1989;23:40–45.
- [106] Lee JC, Downing SE. Coronary dynamics and myocardial metabolism in the diabetic newborn lamb. *Am J Physiol* 1979;237:H118–H124.
- [107] Koltai MZ, Wagner M, Pogatsa G. Altered hyperemic response of the coronary arterial bed in alloxan-diabetes. *Experientia* 1983;39:738–740.
- [108] Koltai MZ, Rosen P, Hadhazy P, et al. Effects of hypoxia and adrenergic stimulation induced alterations in PGI<sub>2</sub> synthesis by diabetic coronary arteries. *J Diabetes Complications* 1988;2:5–7.
- [109] Nitenberg A, Valensi P, Sachs R, et al. Impairment of coronary vascular reserve and Ach-induced coronary vasodilation in diabetic patients with angiographically normal coronary arteries and normal left ventricular systolic function. *Diabetes* 1993;42:1017–1025.
- [110] Nahser Jr. PJ, Brown RE, Osharsson H, Winniford MD, Rossen JD. Maximal coronary flow reserve and metabolic coronary vasodilation in patients with diabetes mellitus. *Circulation* 1995;91:635–640.
- [111] Frank RN. On the pathogenesis of diabetic retinopathy. A 1990 update. *Ophthalmology* 1991;98:586–593.
- [112] Wohaieb SA, Godin DV. Alterations in free radical tissue-defense mechanisms in streptozotocin-induced diabetes in rat. Effects of insulin treatment. *Diabetes* 1987;36:1014–1018.
- [113] Thompon KH, Godin DV, Lee M. Tissue antioxidant status in streptozotocin-induced diabetes in rats. Effects of dietary manganese deficiency. *Biol Trace Elem Res* 1992;35:213–224.
- [114] Giugliano D, Ceriello A, Paolisso G. Diabetes mellitus, hypertension and cardiovascular disease: Which role for oxidative stress?. *Metabolism* 1995;44:363–368.
- [115] Fonseca VA, Stone A, Munshi M, et al. Oxidative stress in diabetic macrovascular disease: Does homocysteine play a role?. *South Med J* 1997;90:903–906.
- [116] Gillery P, Monboisse JC, Maquart FX, Borel JP. Glycation of proteins as a source of superoxide. *Diabetes Metab* 1988;14:25–30.
- [117] Wolff SP, Dean RT. Glucose auto-oxidation and protein modification. The potential role of ‘autooxidative glycosylation’ in diabetes. *Biochem J* 1987;245:243–250.
- [118] Hunt JV, Smith CCT, Wolff SP. Autooxidative glycosylation and possible involvement of peroxides and free radicals in LDL modification by glucose. *Diabetes* 1990;39:1420–1424.
- [119] Freeman BA, Crapo JD. Biology of disease. Free radicals and tissue injury. *Lab Invest* 1982;47:412–426.
- [120] Kakkar R, Kalra J, Mantha V, Prasad K. Lipid peroxidation and activity of antioxidant enzymes in diabetic rats. *Mol Cell Biochem* 1995;151:113–119.
- [121] Kakkar R, Mantha SV, Kalra J, Prasad K. Time course study of oxidative stress in aorta and heart of diabetic rat. *Clin Sci* 1996;91:441–448.
- [122] Mak DHF, Ip SP, Li PC, Poon MKT, Ko KM. Alterations in tissue glutathione antioxidant system in streptozotocin-induced diabetic rats. *Mol Cell Biochem* 1996;162:153–158.
- [123] Rosen P, Ballhausen T, Bloch W, Addicks K. Endothelial relaxation is disturbed by oxidative stress in the diabetic rat heart: influence of tocopherol as antioxidant. *Diabetologia* 1995;38:1157–1168.
- [124] Yadav P, Sarkar S, Bhatnagar D. Action of capparid decidua against alloxan-induced oxidative stress and diabetes in rat tissues. *Pharmacol Res* 1997;36:221–228.
- [125] Sivan E, Reece EA, Wu YK, et al. Dietary vitamin E prophylaxis and diabetic embryopathy: Morphologic and biochemical analysis. *Am J Obstet Gynecol* 1996;175:793–799.
- [126] Douillet C, Chancerelle Y, Cruz C, et al. High dosage vitamin E effect on oxidative status and serum lipids distribution in streptozotocin-induced diabetic rats. *Biochem Med Metab Biol* 1993;50:265–276.
- [127] Paolisso G, D’Armora A, Giugliano D, et al. Pharmacologic doses of vitamin E improve insulin action in healthy subjects and non-insulin-dependent diabetic patients. *Am J Clin Nutr* 1993;57:650–656.
- [128] Ting HH, Timimi FK, Foles KS, et al. Vitamin C improves endothelium-dependent vasodilation in patients with non-insulin-dependent diabetes mellitus. *J Clin Invest* 1993;97:22–28.
- [129] Bierhaus A, Chevion S, Chevion M, et al. Advanced glycation end product-induced activation of NF- $\kappa$ B is suppressed by alpha-lipoic acid in cultured endothelial cells. *Diabetes* 1997;46:1481–1490.
- [130] Karasu C, Ozansoy G, Bozkurt O, Erdogan D, Omeroglu S. Antioxidant and triglyceride-lowering effects of vitamin E associated with the prevention of abnormalities in the reactivity and morphology of aorta from streptozotocin-diabetic rats. Antioxidants in Diabetes-Induced Complications (ADIC) Study Group. *Metabolism* 1997;46:872–879.
